# Supplementary material for: RvD1 Combined with Exercise Promotes Mitophagy and Reduces Neuronal Apoptosis in Mice After Intracerebral Hemorrhage via the BDNF/TrkB/PI3K/AKT Pathway
Source: Research Square preprint supplement (doi:10.21203/rs.3.rs-5092487/v1), 2024-12-09
Supplement: Supplementary file 1 [file c5df21d2d5c472e317e6eb2a.pdf]

# **RvD1 Combined with Exercise Promotes Mitophagy and Reduces Neuronal Apoptosis in Mice After Intracerebral Hemorrhage via the BDNF/TrkB/PI3K/AKT Pathway**

Lv Xiaoyu, Li Dandan, Ouyang Tianzhao, Zhang Ziyu, Li Zhuang, Liu Mingrui, He Yusong, Zhong Yangyang, Li Yanjiao, Shi Chun, Wang Siqu, Li Tong, Zhang Benshi.

**RvD1 Combined with Exercise Rehabilitation Training Significantly Alleviates Neuroinflammation Post-Intracerebral Hemorrhage via the BDNF/TrkB/p-Akt/PI3K Pathway.** The full-length membrane was cut out of the region containing the band of interest with reference to the markers used as indicators that were simultaneously applied during electrophoresis. The samples derive from the same experiment and that blots were processed in parallel. Below is the original exposure image without clipping; the edges of the membrane have been indicated by arrows

Supplementary Figure S1: Fig 3a -BDNF (32 kDa)

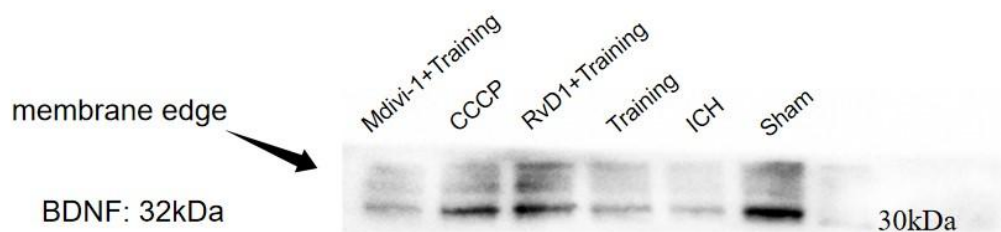

Supplementary Figure S2: Fig 3a -TrkB (90-95kDa)

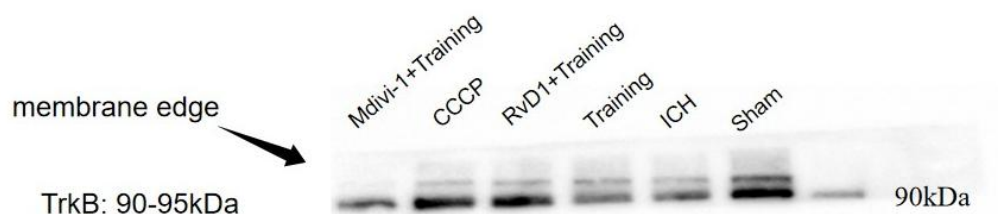

Supplementary Figure S3: Fig 3a -PI3K (110 kDa)

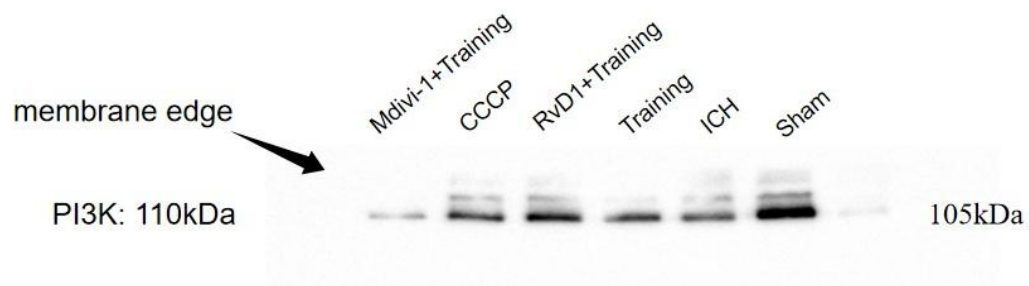

Supplementary Figure S4: Fig 3a -GAPDH (36 kDa)

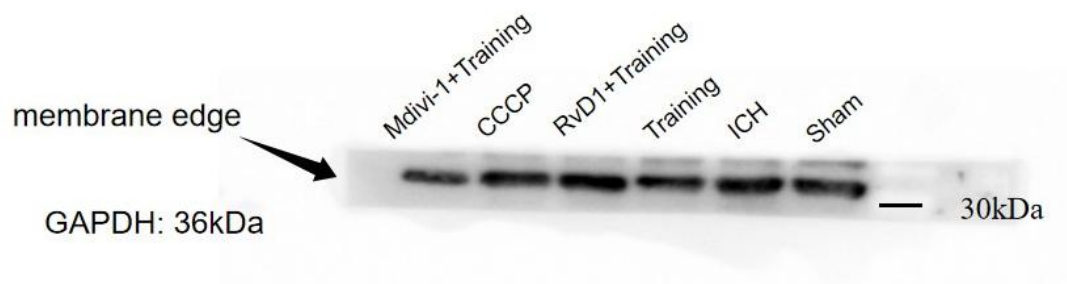

Supplementary Figure S5: Fig 3a -AKT (56-62 kDa)

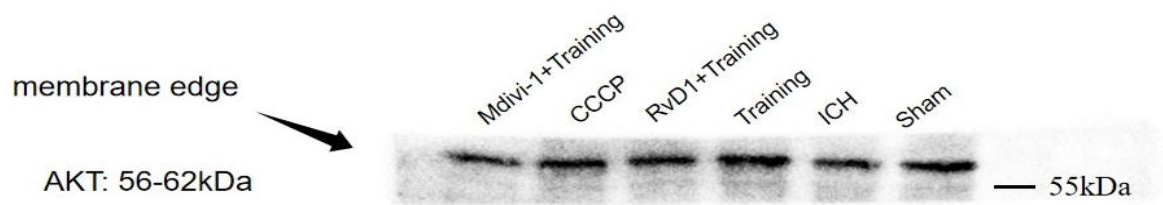

Supplementary Figure S6: Fig 3a -p-AKT (60-62 kDa)

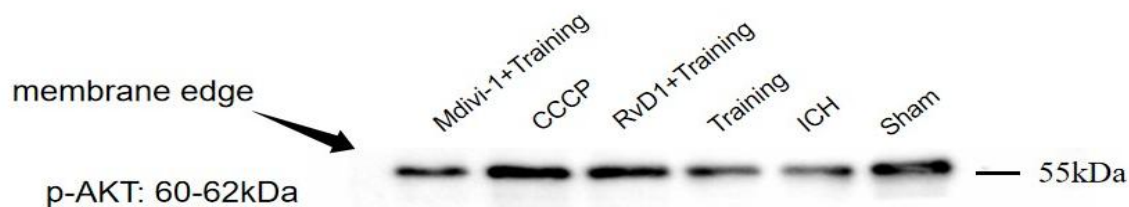

Table S1. The scoring criteria for the mNss include the Exercise test, the Sensory test, the Balance beam test, and the assessment of Loss of reflexes and abnormal movements. If a mouse fails to complete any of these four major aspects, it receives a score. The more severe the neurological deficit, the higher the total score, with a maximum of 18 points.

| Test type                                                                                                                | score    |
|--------------------------------------------------------------------------------------------------------------------------|----------|
| <b>Exercise test</b>                                                                                                     | <b>6</b> |
| Tail lifting test                                                                                                        | 3        |
| Flexion of the forelimb                                                                                                  | 1        |
| Hind limb flexion                                                                                                        | 1        |
| The head deviates from the vertical axis by $>10^\circ$ within 30s                                                       | 1        |
| Place mice on the floor (normal =0; maximum =3)                                                                          | 3        |
| Normal walking                                                                                                           | 0        |
| Can't walk straight                                                                                                      | 1        |
| Turn around to the paraplegic side                                                                                       | 2        |
| Tip over to the palsy side                                                                                               | 3        |
| <b>Sensory test</b>                                                                                                      | <b>2</b> |
| Placement tests (visual and tactile tests)                                                                               | 1        |
| Proprioceptive test (deep sensation, pressing the paw against the edge of the table to stimulate the muscle of the limb) | 1        |
| <b>Balance beam test (normal =0; Maximum value =6)</b>                                                                   | <b>6</b> |
| Steady balance position                                                                                                  | 0        |
| Grip the edge of the balance beam                                                                                        | 1        |
| Hold onto the balance beam. Drop one limb off the balance beam                                                           | 2        |
| Hold the balance beam tightly, both limbs drop from the balance beam or rotate on the balance beam ( $>60$ seconds)      | 3        |
| Trying to balance on beam but falling ( $>40$ seconds)                                                                   | 4        |
| Trying to balance on beam but falling ( $>20$ seconds)                                                                   | 5        |
| To fall;No attempt to balance on beam ( $<20$ seconds)                                                                   | 6        |
| <b>Loss of reflexes and abnormal movement</b>                                                                            | <b>4</b> |
| Auricular reflex (shaking head when touching the external ear canal)                                                     | 1        |

|                               |   |
|-------------------------------|---|
| Corneal reflex                | 1 |
| Startle reflex                | 1 |
| Epilepsy, myoclonus, dystonia | 1 |

---
